# Supplementary material for: Easily Attach/Detach Reattachable EEG Headset with Candle-like Microneedle Electrodes
Source: MDPI journal article supplement (doi:10.3390/mi14020400), 2023-02-06
Supplement: s1 [file s1]

## Supplemental Materials

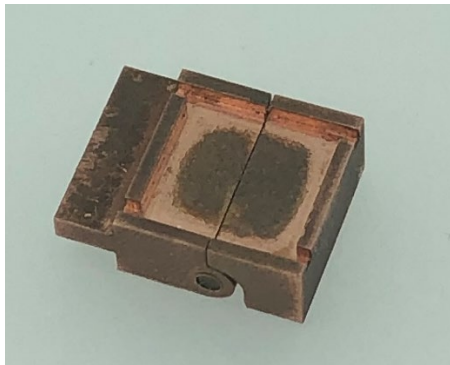

(a)

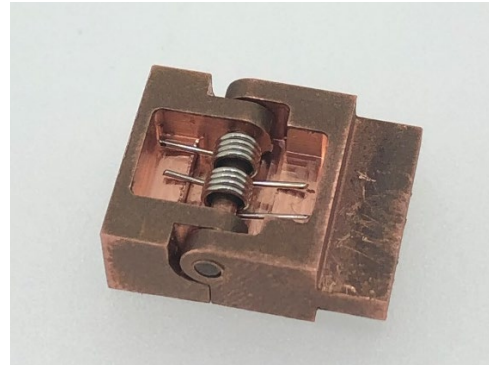

(b)

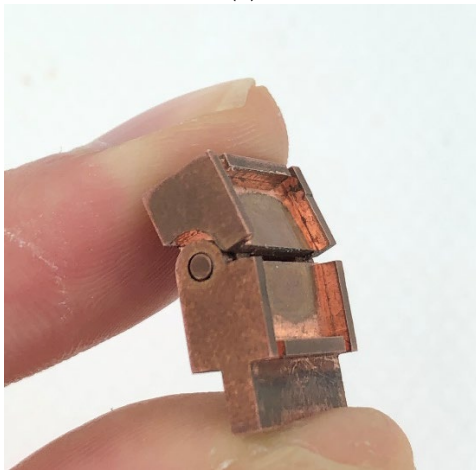

(c)

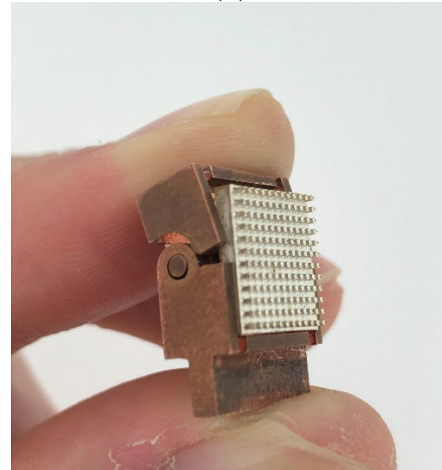

(d)

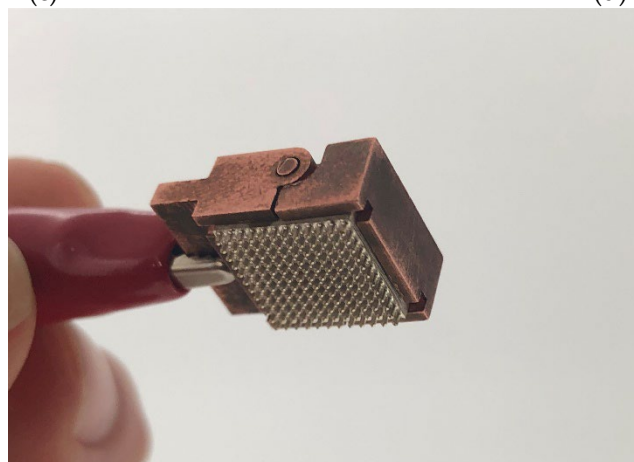

(e)

**Figure S1** Electrode holder made of copper. (a) Front and (b) back of the holder. The holder is composed of two parts, which are connected with a spring. (c, d) The holder can open and hold the CME. (e) The CME is supported by the holder tightly. The EEG acquired with the CME can be accessed via the holder.
